**Fitness and transcriptomic analysis of pathogenic *Vibrio parahaemolyticus* in seawater at different shellfish harvesting temperatures**

Zhuosheng Liu<sup>1</sup>, Chao Liao<sup>1</sup>, and Luxin Wang<sup>1\*</sup>

<sup>1</sup>Department of Food Science and Technology, University of California, Davis, CA

\*Corresponding author: [lxwang@ucdavis.edu](mailto:lxwang@ucdavis.edu)

Word count: **4830**

1 **ABSTRACT (250 words):**

2           To better characterize the population dynamics of *Vibrio parahaemolyticus* (*Vp*)  
3 containing different virulence genes, two *Vp* strains were inoculated into seawater separately and  
4 incubated at temperatures (30 and 10 °C) mimicking summer and winter pre-harvest shellfish  
5 rearing seasons. The cellular responses of these two strains, one containing the thermostable  
6 direct hemolysin (*tdh*<sup>+</sup>) gene and the other one containing *tdh*-related hemolysin (*trh*<sup>+</sup>) gene,  
7 were studied at the transcriptomic level. Results showed that, at 30 °C, *tdh*<sup>+</sup> and *trh*<sup>+</sup> strains  
8 reached  $6.77 \pm 0.20$  and  $6.14 \pm 0.07$  Log CFU/ml respectively after 5 days. During this time,  
9 higher growth rate was observed in the *tdh*<sup>+</sup> strain than the *trh*<sup>+</sup> strain. When being kept at 10 °C,  
10 both *Vp* strains persisted at ca. 3.0 Log CFU/ml in seawater with no difference observed between  
11 them. Growth and persistence predictive models were then established based on the Baranyi  
12 equation. The goodness of fit scores ranged from 0.674 to 0.950. RNA sequencing results  
13 showed that downregulated central energy metabolism and weakened degradation of branched  
14 chain amino acid were observed only in *trh*<sup>+</sup> strain not in *tdh*<sup>+</sup> strain at 30 °C. This might be one  
15 reason for the lower growth rates of the *trh*<sup>+</sup> strain at 30 °C. Histidine metabolism and biofilm  
16 formation pathways were significantly downregulated in both strains at 10 °C. No significant  
17 difference was observed for virulence-associated gene expression between 10 and 30 °C,  
18 regardless of the strains.

19 **SIGINIFICANCE (150 words):**

20           Given the involvement of *Vp* in a wide range of seafood outbreaks, a systematical  
21 characterization of *Vp* fitness and transcriptomic changes at temperatures of critical importance  
22 for seafood production and storage is needed. In this study, predictive models describing the  
23 behavior of *Vp* strains containing different virulence factors are established. While no difference  
24 was observed at the lower temperature (10 C), *tdh*<sup>+</sup> strain had faster growth rate than the *trh*<sup>+</sup>  
25 strain. Transcriptomic analysis showed that significantly higher number of genes were  
26 upregulated at 30 °C than 10 °C. Majority of differentially expressed genes of *Vp* at 30 °C were  
27 annotated to functional categories supporting cellular growth. At the lower temperature, the  
28 down regulation of the biofilm formation pathway and histidine metabolism indicates that the  
29 current practice of storing seafood at lower temperatures not only protect the seafood quality but  
30 also ensure the seafood safety.

31 **KEYWORDS:** *Vibrio parahaemolyticus*, seawater, *tdh*, *trh*, predictive models, RNA-seq

32

33

## 34 **Introduction**

35 *Vibrio parahaemolyticus* (*Vp*) has been one leading seafood-borne pathogenic bacterium  
36 (gram-negative, rod-shaped) commonly found in marine environments, particularly in estuaries  
37 and coastal waters; it has been one major microbiological food safety concern for aquacultural  
38 products, especially raw oysters (1). To mitigate the risk of *Vp* contamination, shellfish farmers  
39 follow guidelines such as National Shellfish Sanitation Program (NSSP) in the United States for  
40 harvesting, handling, and storing oysters (2). Despite these control measures, over 36, 000 *Vp*  
41 infection cases associated with shellfish were annually reported in the United States, and recalls  
42 associated with *Vp* contaminated seafood products continue to occur (3-6). The undesirable  
43 public health consequences of *Vp*-contaminated food also bring economic burden. For instance,  
44 the total cost of illness associated with *Vp* infection increased from \$40,682,312 in 2013 to  
45 \$45,735,332 in 2018 in the United States (7).

46 Given its widely reported prevalence in aquaculture rearing environment and seafood  
47 products, efforts have been made to characterize behaviors of *Vp* in different stages from “sea to  
48 folk” (8, 9). Among different environmental parameters, temperature is one dominant factor  
49 significantly impacting the behavior of *Vp* (10). In coastal environment, significant lower levels  
50 of *Vp* or prevalence have been reported in winter months than summer (11, 12). This common  
51 finding was also accompanied by lowers *Vp* infection incidence rate in colder months based on  
52 the National Outbreak Reporting System (NORS) (13). These reported real-world evidence taken  
53 together underscored the correlation between ambient temperature and *Vp* prevalence and *Vp*-  
54 oriented Vibriosis.

55 RNA sequencing (RNA-seq) is a next-generation transcriptomic technique illuminating  
56 gene expression patterns in targeted organism, which can be applied to yield biological insights

57 about physiological state of bacterial pathogens under different conditions (14, 15).  
58 Transcriptomic analysis has been used to investigate essential cellular mechanisms of *Vp* when  
59 surviving under simulated post-harvest practices (PHP) (e.g. cold storage, high salinity relaying,  
60 and acid-driven PHPs) (16-20). However, the physiological changes of *Vp* in natural seafood  
61 production environment, the impact of different virulence genes on its behavior, and how pre-  
62 harvest environment impacts the behavior of *Vp* during post-harvest handling and processing  
63 remain largely unknown. Therefore, this study aims to better understand the persisting  
64 mechanism of *Vp* in natural shellfish rearing environment, in particularly its cellular responses  
65 and virulence. This information, in turn, can support the development of novel control and  
66 monitoring strategies. The specific aims of this study were 1) investigating the survival and  
67 growth of *Vp* with different virulence genes in seawater at 30 and 10 °C and establishing  
68 predictive models for predicting *Vp* population under different conditions, and 2) profiling gene  
69 expression of *Vp* at 30 and 10 °C and identifying key changes in metabolic pathways and  
70 virulence factors.

71

## 72 **RESULTS AND DISCUSSION**

### 73 **Primary models predicting *Vp* fitness in seawater at different harvesting temperatures**

74 Populations of *Vp* stored in seawater at 10 °C or 30 °C over 10 or 5 days were  
75 enumerated based on the plate count method (**Figs. 1 and 2**). For the 10 °C trials, the inoculation  
76 level of *Vp* in seawater was  $5.70 \pm 0.06$  and  $5.76 \pm 0.14$  Log CFU/ml for *tdh+* (ATCC 43996)  
77 and *trh+* (ATCC 17802) strains, respectively. More rapid population decreasing was observed in  
78 the *trh+* strain compared to the *tdh+* strain. Continuous decreases of culturable *Vp* cells (ca. 2.0  
79 Log CFU/ml) were observed from Day 0 to Day 7 and populational levels reached to  $3.11 \pm 0.19$

80 and  $3.57 \pm 0.17$  Log CFU/ml for *tdh+* and *trh+*, respectively on Day 10. For the 30 °C storage  
81 trial, the initial inoculation level of *Vp* in seawater was  $5.75 \pm 0.07$  and  $5.74 \pm 0.19$  Log CFU/ml  
82 for *tdh+* and *trh+* strains, respectively. Growth of *tdh+* and *trh+* strains was observed and both  
83 strains reached the plateau phase with population levels at  $7.11 \pm 0.04$  and  $6.64 \pm 0.08$  Log  
84 CFU/ml respectively after 8 hours. After *Vp* reaching the plateau phase, significantly higher  
85 populational level in *tdh+* compared with *trh+* in persisted throughout the rest of incubation time.  
86 Difference in fitness between *Vp* strains containing different virulence genes has been reported  
87 by previous studies. S. Khouadja et al. (21) reported that *tdh+* strain showed higher growth rate  
88 compared with *trh* strain when inoculated in sea bass serum and stored at 30 °C for 240 min.

89 The survival/growth data of *Vp* in seawater at 10 and 30 °C obtained from plate count  
90 results were further fitted by the Baranyi function to establish primary predictive models. The  
91 detailed parameters of Baranyi-based primary model predicting *Vp* fitness in seawater are listed  
92 in **Table 1**. The  $R^2$  of primary Baranyi models of *Vp* in seawater at 10 °C were 0.94 and 0.96 for  
93 *tdh+* and *trh+* strains respectively. At 10 °C, populations of the *Vp tdh+* strain decreased from  
94 the initial values (IVs) to the final values (FVs) by 2.44 Log CFU/ml, meanwhile the *trh* strain  
95 decreased from the IVs to the FVs by 2.06 Log CFU/ml. The specific inactivation rate (SIR) in  
96 seawater at 10 °C was  $-0.45 \pm 0.060$  and  $-0.76 \pm 0.11$  Log CFU/day for *tdh+* and *trh+* strain  
97 respectively. No significant difference in *Vp* population reduction over 10 days at 10 °C was  
98 observed between *tdh+* and *trh+* strain based on difference between model predicted initial value  
99 and final value. C. Liao et al. (22) stored oysters inoculated with a five-strain *Vp* cocktail at 4.69  
100 Log CFU/g at 10 °C for 11 days and reported SIR values of  $-0.073 \pm 0.017$  Log CFU/day. The  
101 difference in SIR values between the current study and the previous study might be caused by the  
102 different nutrient levels available in oysters vs. in seawater.

103           When the storage temperature was kept at 30 °C, the population of *tdh*<sup>+</sup> strain increased  
104 from IVs to the FVs with a growth rate of 1.30 Log CFU/ml; the *trh*<sup>+</sup> strain increased from the  
105 IVs to the FVs with a growth rate of 0.96 Log CFU/ml. The R<sup>2</sup> of primary Baranyi models of *Vp*  
106 in seawater at 30 °C were 0.97 and 0.95 for *tdh*<sup>+</sup> and *trh*<sup>+</sup> strains, respectively. Higher specific  
107 growth rate (SGR) was observed on *tdh*<sup>+</sup> ( $0.39 \pm 0.13$  Log CFU/day) than *trh*<sup>+</sup> strain ( $0.15 \pm$   
108  $0.058$  Log CFU/day) ( $p < 0.05$ ).

109

### 110 **Transcriptomic profiles of *Vp* strains when surviving at different temperatures**

111           Potential differences between the *tdh*<sup>+</sup> and the *trh*<sup>+</sup> strains at the transcriptomic level  
112 was further investigated at two temperatures. Raw RNA-seq reads were mapped to the reference  
113 transcriptome using Salmon. The mapping rate of aligning raw sequence reads with the reference  
114 transcriptome ranged from 65.30 to 78.30%. A total of 4,001 genes were successfully identified  
115 after the Salmon quasi-mapping against the protein coding sequence of *Vp* RIMD2210633. The  
116 Pearson correlation coefficient (PCC) of *Vp* gene expression profiles in the control (two hours  
117 after seawater inoculation) and the test groups (10 and 30 °C incubation over five days) was  
118 calculated to examine the linear relationship of gene expression patterns. As shown in **Fig. S2a**,  
119 PCC of *Vp* transcriptome was conducted among three conditions (control reference, 5 days of  
120 storage at 10 °C, and 5 days of storage at 30 °C). The PCC of *Vp* transcriptome between *tdh*<sup>+</sup>  
121 and *trh*<sup>+</sup> strains in the control group was 0.9,9 suggesting that the gene expression pattern of  
122 *tdh*<sup>+</sup> and *trh*<sup>+</sup> strains before storage was similar and could serve as the control reference for  
123 following analysis. The PCC of *Vp* transcriptome analysis between the *tdh*<sup>+</sup> and the *trh*<sup>+</sup> strains  
124 after 5-day incubation at 10 °C was 0.94, and the PCC of *Vp* transcriptome between *tdh*<sup>+</sup> and  
125 *trh*<sup>+</sup> strains was 0.89 after 5-day incubation at 30 °C. This indicated that correlation of gene

126 expression pattern between *tdh+* and *trh+* strains was reduced at 30 °C compared with 10 °C.  
127 Principal component analysis (PCA) of *Vp* transcriptomics data was conducted to examine  
128 variances in gene expression among samples. Principal component 1 (PC1) and principal  
129 component 2 (PC2) explained 48.69% and 16.89% variances in gene expression of sequenced  
130 transcript reads among control/test groups (**Fig. S2b**). The transcriptome of *Vp* at 10 °C were  
131 close to counterparts in control condition, and whereas transcriptome of *Vp* at 30 °C were  
132 separated from counterparts in control condition. There was slightly more variation in *Vp*  
133 transcriptome profiles between *tdh+* and *trh+* strains at 10 °C ( $R^2 = 0.67$ ) than 30 °C ( $R^2 = 0.73$ )  
134 (**Fig. S3**).

135 Differentially expressed genes (DEGs) at the transcriptomic level were further  
136 determined by RNA-seq analysis. Overall, more DEGs were detected in *Vp* transcriptome at  
137 30 °C compared with 10 °C (**Fig. 3**). Specifically, 1,795 and 1,996 DEGs were identified in  
138 transcriptomes of *tdh+* and *trh+* strains at 30 °C, respectively, and whereas 283 and 984 DEGs  
139 were identified in transcriptomes of *tdh+* and *trh+* strains at 10 °C, respectively. Among DEGs at  
140 30 °C, 858 and 977 DEGs were significantly upregulated (Log<sub>2</sub> fold change  $\geq 1$  and FDR-  
141 corrected *p*-values  $< 0.05$ ) for *tdh+* and *trh+* strains, meanwhile 937 and 1019 DEGs were  
142 significantly downregulated (Log<sub>2</sub> fold change  $\leq -1$  and FDR-corrected *p*-values  $< 0.05$ ) for *tdh+*  
143 and *trh+* strains, respectively. Among DEGs identified at 10 °C, 139 and 479 DEGs were  
144 significantly upregulated (Log<sub>2</sub> fold change  $\geq 1$  and FDR-corrected *p*-values  $< 0.05$ ) for *tdh+*  
145 and *trh+* strains, respectively, and 144 and 505 DEGs were significantly downregulated (Log<sub>2</sub>  
146 fold change  $\leq -1$  and FDR-corrected *p*-values  $< 0.05$ ) for *tdh+* and *trh+* strains, respectively (17).



147 To validate the gene expression analyzed by RNA-Seq, seven genes were randomly selected and  
148 the gene expression was evaluated using qRT-PCR. Results from qRT-PCR were consistent with  
149 that (upregulated or downregulated) of RNA-seq data analysis, suggesting the reliability of  
150 results from RNA-seq (**Fig. S4**).

151

### 152 **Biological trace of transition from exponential to stationary phase**

153 For test groups, RNA was extracted from stationary-phase five days after *Vp* incubated at  
154 10 and 30 °C, as it is believed that *Vp* is usually entering into the stationary phase in the  
155 environment and food systems (23). When microbial growth shifts from exponential phase to  
156 stationary phase, the expression of growth-associated genes becomes slow down and meanwhile  
157 persistence-associated genes are increasingly expressed so that bacterial cells can remain  
158 metabolically active in stationary phase (24). It is expected that 70S ribosomes are converted into  
159 inactive 100S ribosome with loss of ribosomal translation activity via dimerization, which  
160 requires ribosome modulation factors (RMF) covering peptidyl transferase domain and the  
161 entrance of the peptide exit tunnel (25). For both *tdh+* and *trh+* strains, genes annotated to  
162 ribonucleoprotein complex and large ribosomal subunit were significantly enriched based on  
163 GSEA-GO results (**Figure 7**). Significant activation of cofactor biosynthesis pathway was  
164 observed in both *tdh+* and *trh+* strains based on GSEA-KEGG results (**Figure 9**). These results  
165 might suggest the event of ribosome dimerization in *Vp* transitioning from exponential to  
166 stationary phase and imply the transition of *Vp* to a non-proliferative metabolic state.

167

### 168 **Cellular response of *Vp* adapting to 10 °C seawater**

169           Although more DEGs were observed in transcriptome of *trh*<sup>+</sup> than *tdh*<sup>+</sup> strain, less  
170 enriched GO terms were enriched through GSEA in *trh*<sup>+</sup> strain than *tdh*<sup>+</sup> strain. Commonly  
171 observed in transcriptome profile of both strains, aromatic amino acid and alpha amino acid  
172 groups biosynthesis associated gene clusters were significantly downregulated, indicating *Vp*  
173 saved energy budget by avoiding expressing precursors of secondary metabolites (**Fig. 5**).  
174 Besides aromatic amino acid biosynthesis significantly enriched functional gene clusters  
175 including organic substance transport and cellular amino acid biosynthetic process in *trh* strain  
176 were all downregulated, which might suggest the inactive cellular status.

177           Previous studies have indicated that cellular strategies applied by *Vp* to address cold  
178 stress include upregulation of cold stress related proteins and increase of membrane fluidity by  
179 enhancing fatty acid metabolism (17, 26, 27). Similar results were shown in this study. VP1889  
180 encoding the cold shock protein A (*cspA*) was significantly upregulated for both strains (3.90 and  
181 3.19 Log 2-fold change for *tdh*<sup>+</sup> and *trh*<sup>+</sup> strains, respectively) at 10 °C (FDR-corrected *p*-values  
182 < 0.05). CspA is an RNA chaperone that reduces RNA secondary folding caused by decreasing  
183 temperatures. The upregulation of *cspA* indicated that *Vp* counteracted the translational hardness  
184 caused by RNA folding at 10 °C by increasing the *cspA* expression (28).

185           Modification of fatty acid is critical for bacterial survival at low temperatures, as lipid  
186 molecules can become more ordered and solidified as temperature decreases (29). T. Xie et al.  
187 (17) pointed out that the essential role of co-occurred downregulated pyruvate metabolism and  
188 upregulated fatty acid biosynthesis in cold tolerance of *Vp* at 4 °C. Although no direct evidence  
189 related to pyruvate metabolism and fatty acid biosynthesis were observed in transcriptome  
190 profile of *tdh*<sup>+</sup> strain, thiamine metabolism was shown to be significantly upregulated (FDR-  
191 corrected *p*-values < 0.05) (**Fig. 7**). Thiamine pyrophosphate (TPP) is the key co-enzyme in fatty

192 acid biosynthesis, which involves in the interconversion of pyruvate to acetal-CoA by pyruvate  
193 dehydrogenase, the fundamental precursor in fatty acid biosynthesis (30). The observed  
194 upregulated thiamine metabolism pathway might suggest potential upregulated fatty acid  
195 biosynthesis in *tdh*<sup>+</sup> strain in seawater at 10 °C., pyruvate metabolism was significantly  
196 upregulated in *trh*<sup>+</sup> strain in seawater at 10 °C (**Fig. 7**). At the proteomic level, J. Tang et al. (31)  
197 reported that pyruvate dehydrogenase complex repressor (a regulator negatively impacts the  
198 formation of pyruvate dehydrogenase complex, PDHC) was mostly downregulated in *Vp*  
199 incubated at 4 °C after 18 hours, and suggested that the resulted enhanced PDHC activity was  
200 critical for *Vp* to maintain its viability under cold stresses. Taken together, these results  
201 highlighted the active pyruvate metabolism change involved in *Vp* surviving at low temperatures.

202

### 203 **Cellular responses of *Vp* growing at 30 °C**

204 A strong signature of growth was observed in *Vp* incubated at 30 °C compared with  
205 10 °C, including ribosome biogenesis, amino acid metabolism, and purine metabolism (**Fig. 4**).  
206 Greater than 50% of DEGs were annotated to biosynthesis processes, including the  
207 macromolecule biosynthetic process, cellular biosynthetic process, and organic substance  
208 biosynthetic process that were significantly upregulated in *tdh*<sup>+</sup> strain (**Fig. 6**). Amino acid  
209 biosynthesis pathway and alanine, aspartate and glutamate metabolism pathways were  
210 significantly upregulated (**Fig. 7**). Alanine, aspartate and glutamate are critical amino acids  
211 serving as precursor for diverse metabolites as essential cellular component for bacterial cell  
212 growth (32, 33). In addition, both arginine biosynthesis and arginine metabolism were both  
213 significantly upregulated (**Fig. 8**). Similar results were reported in the previous work: L. Li et al.  
214 (34) reported that arginine biosynthesis pathway was upregulated in *Vp* incubated in eutrophic

215 outlet water at 30 °C compared with counterparts incubated at 16 °C. Arginine biosynthesis is  
216 essential to microbial growth as arginine can be converted putrescine, which serves as an  
217 essential regulator for cell growth, differentiation, proliferation, and various physiological  
218 processes (35, 36). These upregulated biosynthetic process contributed to the fitness of *tdh*<sup>+</sup>  
219 strain at optimum growth temperature and maintaining stable populational level at stationary  
220 phase.

221 Higher growth rate was observed in *tdh*<sup>+</sup> strain in comparison to *trh*<sup>+</sup> strain at the  
222 phenotypic level. Results at transcriptomic levels provided additional biological insights. More  
223 significantly downregulated functional gene clusters and metabolism pathways were detected in  
224 *trh*<sup>+</sup> strain than *tdh*<sup>+</sup> strain based on GSEA results (**Figs. 6 and 9**). Functional gene clusters  
225 associated with ribosome, ribosome biosynthesis, and transfer RNA biosynthesis coupled with  
226 pathway enrichment in central energy metabolism reflect energy use for cell growth and  
227 proliferation of *tdh*<sup>+</sup> strain at 30 °C. Central energy metabolisms include  
228 glycolysis/gluconeogenesis, pyruvate metabolism, and TCA cycle were significantly  
229 downregulated in the *trh*<sup>+</sup> strain after 5 days of incubation at 30 °C, suggesting that the energy  
230 generation was weakened in *trh*<sup>+</sup> strain. Moreover, oxidative phosphorylation pathway was  
231 significantly downregulated in *trh*<sup>+</sup> strain as well, indicating the process of intracellular ATP  
232 synthesis was inhibited. In addition to downregulation of energy metabolism pathways,  
233 significantly downregulated usage of valine, leucine, and isoleucine pathway was detected in  
234 *trh*<sup>+</sup> strain (**Fig. 8**). Valine, leucine, and isoleucine are the core branched chain amino acids  
235 essential for bacterial growth (37). Such decreased degradation of branched chain amino acid  
236 might inhibit interconversion to metabolites essential for growth and co-factors. This observed

237 *trh+* strain-only inferiority due to turned off central energy metabolism might explain its lower  
238 fitness in comparison to *tdh+* strain in seawater at 30 °C.

239

## 240 **Expression of virulence genes at different temperatures**

241 Microbial pathogenesis can be significantly affected by environmental temperature (38).

242 Virulence and pathogenesis of *Vp* was commonly reported based on studies using live animal

243 models (39-41). However, limited information about its virulence in natural seawater

244 environment has been reported at this moment. Based on the GSEA-KEGG results, the biofilm

245 formation pathway was significantly downregulated at 10 °C; this has been observed in both

246 *tdh+* and *trh+* strains. N. Han et al. (42) reported that the biofilm formation of *Vp* on food and

247 food surfaces increased as the environmental temperatures increased. Both results highlight the

248 importance of temperature during both pre-harvest production and handling and post-harvest

249 processing and storage. Moreover, histidine metabolism was significantly downregulated in both

250 strain *Vp* at 10 °C, indicating potential decreases in histamine formation (**Fig. 7**). Histamine is a

251 major allergen in aquaculture products (43). Less active cellular status of *Vp* in seawater during

252 winter season could lead to less metabolites potentially serving as causative allergic agent to

253 human. To validate this observation, metabolomic profiling of *Vp* in seawater at different

254 temperature warrant additional future studies.

255 S. Urmersbach et al. (26) reported that expression of major virulence-associated genes of

256 *Vp* RIMD2210633 such as *tdh*, *toxR*, *toxS* remained unaffected by cold and heat shock in

257 alkaline peptone water (4 and 42 °C, respectively). In this study, our results showed that

258 virulence-associated genes, including *toxR*, *toxS*, and T3SS1 effectors *vopQ*, *vopR*, *vopS*, and

259 VPA0450, showed less than 1.0 Log 2-fold change. No significant gene expression of VPA1509

260 was found in *tdh*<sup>+</sup> and *trh*<sup>+</sup> strain at 10 °C over 10-day storage. The less active expression of  
261 major haemolysin (VPA1509) in *Vp* in cold might be due to temperature dependent  
262 conformational change in *tdh* and *trh* encoded hemolysin protein, which led to increasing energy  
263 cost of transcription (44). The expression level of haemolysin encoded genes was significantly  
264 downregulated 30 °C (with -1.99 and -2.14 Log 2-fold change for *tdh*<sup>+</sup> and *trh*<sup>+</sup>, respectively).  
265 Repressed expression of virulence-associated genes was expected when bacteria need to actively  
266 regulate genes coding for enzymes essential for growth in the optimal environment (45).

267         Moreover, VP1890 (*vacB*) encoding a putative virulence-associated protein was  
268 significantly upregulated for *tdh*<sup>+</sup> and *trh*<sup>+</sup> strains at both 10 and 30 °C (with 4.25 and 2.13 Log  
269 2-fold changes for *tdh*<sup>+</sup> and *trh*<sup>+</sup> strains at 10 °C, respectively; 4.27 and 3.42 Log 2-fold change  
270 for *tdh*<sup>+</sup> and *trh*<sup>+</sup> strains at 30 °C, respectively, FDR-corrected *p*-values < 0.05). The product of  
271 *vacB* was reported to be an exoribonuclease RNase contributing to the virulence of *Shigella* and  
272 enteroinvasive *Escherichia coli* (46). The strong expression of *vacB* in *Vp* was consistent with  
273 previous studies. L. Meng et al. (47) reported more than 5 Log 2-fold upregulation of *vacB* in  
274 viable but non-culturable state *Vp* induced at 4 °C over 40 days. S. Urmersbach et al. (26) also  
275 reported *vacB* showed the highest upregulation (7.01 Log 2-old change) in *Vp* when being  
276 incubated in APW at 15 °C for 30 min. All of combined information confirmed high expression  
277 levels of *vacB* at temperatures ranging from 4 to 15 °C. In this study, the expression of *vacB* was  
278 also upregulated at 30 °C. As discussed by Liao et al., the detection of *Vp* at lower temperatures  
279 can be challenging, newer candidate genes that continuously expressed at higher levels at various  
280 tempeatures are needed. Through this study, results indicated that *vacB* could be served as a  
281 potential biomarker to identify *Vp* in natural coastal environment across seasons. Through  
282 BLAST, the *vacB* nucleotide sequence shows high specificity in *Vp*.

283

## 284 CONCLUSION

285 This study investigated the fitness and cellular response at the transcriptomic level of two  
286 *Vp* strains (*tdh+* and *trh+*) in seawater at different temperatures corresponding to oyster  
287 harvesting seasons (10 and 30 °C). When *Vp* was incubated in seawater at 10 °C, persistence of  
288 both *tdh+* and *trh+* strains was observed over 10 days and higher die-off rate was observed on  
289 *trh+* than *tdh+* strain based on predicted model. When *Vp* was incubated in seawater at 30 °C,  
290 growth of *tdh+* strain was better than *trh+* strain and higher growth rate was observed on on *tdh+*  
291 than *trh+* strain based on predicted model. More DGEs were detected at 30 °C than 10 °C,  
292 indicating that cellular responses of *Vp* at the transcriptomic level were more complex during  
293 summer months. Expression of cold shock associated genes in *Vp* in seawater at 10 °C were  
294 upregulated. No remarkable gene expression of VPA1509 (*tdh1*) was observed in *tdh+* and *trh+*  
295 strains at 10 °C over 10-day storage, but the gene expression was significantly downregulated  
296 30 °C, which highlighted cost-effective energy allocation strategy of *Vp* during growth and  
297 persistence. The *vacB* gene encoding a putative virulence-associated protein (VP1890) presented  
298 significantly upregulated expression in *tdh+* and *trh+* strains at both 10 and 30 °C. In addition,  
299 *tdh+* and *trh+* strains in seawater at 10 °C showed downregulated biofilm formation pathway and  
300 histidine metabolism. Based on biological insightfulness from *Vp* transcriptome profile, pre-  
301 harvesting temperatures play impacts on the cellular response and virulence of *Vp* in seawaters.  
302 The valuable information provided in this study reveal that it is critical to understand behaviors  
303 of *Vp* to better assist with *Vp* risk assessment and management in oyster harvesting season.

304

## 305 MATERIALS and METHODS

306 **Culture preparation and incubation conditions.** Frozen culture of *Vp* strains ATCC 43996  
307 (*tdh+*) and ATCC 17802 (*trh+*) purchased from American Type Culture Collection (ATCC) were  
308 streaked and activated on Tryptic Soy Agar (TSA) supplemented with 3% NaCl. Cultures were  
309 incubated at 37 °C for overnight. After that, a single colony was picked from each TSA plate and  
310 transferred into 10 ml of Tryptic Soy Broth (TSB) supplemented with 3% NaCl for additional 24  
311 hours of incubation at 37 °C. After incubation, a loopful of fresh liquid culture was transferred  
312 into another 10 ml of fresh TSB supplemented with 3% NaCl. The inoculated TSB was  
313 incubated at 37 °C for overnight and washed on the next day by centrifugation (Eppendorf,  
314 Hauppauge, NY, USA) at 3,000 × g for 10 min. Washed cultures were resuspended with ca. 2 ml  
315 of phosphate-buffered saline (PBS; pH 7.4). The optical density at 600 nm (OD<sub>600</sub>) of each  
316 washed culture was adjusted to 1.6 ± 0.1 by using a spectrophotometer (Thermo Scientific,  
317 Piscataway, NJ, USA). This washed and adjusted culture has approximate 7.0 Log CFU/ml of  
318 cells based on plate count results. To inoculate the seawater, 1 ml of washed culture was added  
319 into 9 ml of autoclaved natural seawater. Seawater was collected from the from the Auburn  
320 University Marine Extension and Research Center located in Dauphin Island, AL. Inoculated  
321 seawater samples were first kept at ambient temperature for 2 hours to enable the *Vp* cultures to  
322 adapt to the new environment. After 2 hours, inoculated seawater samples were stored at 10 °C  
323 for 10 days or 30 °C for 5 days.

324

325 **Enumeration of *Vp* in inoculated seawater samples by using the plate count method.** During  
326 storage, sub samples (1 ml each) were taken and plated every 24 h for the 10 °C storage  
327 condition and were plated every 2 h for the first 12 h then at hours 24, 48, 72 , and 120 for the  
328 30 °C storage condition. Three biological replicates were conducted. Every 1 ml of seawater



329 sample were diluted in serial 10-fold dilutions, and plated onto Thiosulfate-citrate-bile salts-  
330 sucrose (TCBS) plates (BD, Sparks, MD, USA). Plates were incubated at 37 °C for 18 h before  
331 enumeration. Plates were then placed back to the incubator and the colony counts were  
332 confirmed after another 24 hour of incubation. *Vp* concentrations were expressed in common  
333 logarithm transformation format with the unit of CFU/ml.

334

335 **Statistical analysis and predictive models for describing *Vp* behaviors in seawater.** The  
336 populations of *Vp* present in seawater were enumerated at different time intervals at 10 and 30 °C.  
337 One-way Analysis of Variance (ANOVA) followed by the Tukey test was applied to compare  
338 the difference in *Vp* concentrations as predicted by primary predictive models. Primary  
339 predictive models were established for two *Vp* strains at two storage temperatures with the  
340 OriginPro 2023 software (OriginLab Corporation, Northampton, MA, USA).  $P < 0.05$  was  
341 considered statistically significant. The Baranyi model (see equation 1) was chosen to fit the *Vp*  
342 population data and the calculations were performed using the DMfit tool available at the  
343 Combase website, <https://browser.combase.cc/>, (48). The equation of Baranyi model is as  
344 follows:

$$y(t) = y_0 + \mu_{min}A(t) - \frac{1}{m} \ln\left(1 + \frac{e^{m\mu_{min}A(t)} - 1}{e^m(y_{end} - y_0)}\right)$$

$$A(t) = t + \frac{1}{v} \ln\left(\frac{e^{-vt} + q_0}{1 + q_0}\right)$$

345 where  $y$  is the natural logarithm of the bacteria concentration at any given time (ln CFU per  
346 milliliter),  $y_0$  and  $y_{end}$  are the initial value and the end value of  $y$ ,  $A(t)$  is the equation governing  
347 the duration of the period preceding the Log linear inactivation phase,  $t$  is time (day),  $m$   
348 determines the smoothness of the transition from the exponential inactivation phase to the

349 survival tail,  $\mu_{min}$  is the minimum value of the inactivation rate or the maximum value of the  
350 growth rate,  $v$  is the rate at which the bacteria lose the ability to survive during the shoulder, and  
351  $q_0$  is the initial physiological state of bacterial cells.

352

353 **RNA extraction and sequencing.** RNA samples extracted from the *Vp* 2 hours after inoculation  
354 was labeled as the control, and RNA samples extracted from *Vp* strain at the end of 5 days of  
355 storage at 10 or 30 °C was labeled as test group. To extract the RNA, 1 ml of *Vp* culture was  
356 taken and centrifuged at 3,000 x g for 10 min. The supernatant was removed and the cell pellet  
357 was re-suspended in 1 ml of PBS. The total bacterial RNA was extracted by using the Qiagen  
358 RNeasy mini kit (Qiagen, Valencia, CA) following the manufacturer's instruction. The quality of  
359 the extracted RNA was measured with the Agilent 2100 electrophoresis bioanalyzer (Agilent,  
360 Santa Clara, CA) to ensure that the RNA integrity numbers (RIN) of all RNA samples were  
361 greater than 7.0. Once the RNA quality was confirmed, cDNA library was prepared by using the  
362 QuantiTect reverse transcription kit (Qiagen, Valencia, CA). The cDNA library was then sent to  
363 the Genomic Services Laboratory at HudsonAlpha Genome Sequencing Center (Huntsville, AL)  
364 and sequenced on the Illumina HiSeq 2500 platform to generate 50 bp pair-end reads.

365

366 **Transcriptomics analysis.** A schematic illustration of transcriptomics analysis pipeline is shown  
367 in **Fig. 1**. The quality of raw reads was checked by FASTQC. Given the small size of bacterial  
368 genome (approximately 5.1 MB for *Vp*) and since there was no potential mRNA splicing issues,  
369 a fast and bias-aware analytical pipeline, Salmon, was used to achieve quantification of transcript  
370 expression mapping (49, 50). Salmon was used to align the reads against the *Vp* RIMD 2210633  
371 protein coding sequence (CDS) region of each gene (reference transcriptome) [GenBank

372 accession number GCA\_000196095.1]) with parameters -gcBias. Read counts were imported  
373 into R, filtered, and converted to mRNA transcripts by using the tximport package (51). Deseq2  
374 was used to achieve data normalization and identify differentially expressed genes (52). Genes  
375 with an FDR-corrected p-values  $< 0.05$  were considered significant. Threshold of Log2 fold  
376 change  $\geq 1$  was considered upregulated and threshold of Log2 fold change  $\leq -1$  was considered  
377 downregulated (17). Reference transcriptome annotation against Gene Ontology database was  
378 conducted by using eggno-mapper (53). Gene set enrichment analysis (GSEA) was performed  
379 for genes that were upregulated and downregulated in both storage temperatures against the  
380 Gene Ontology (ont = ALL) and the Kyoto Encyclopedia of Genes and Genomes (organism =  
381 vpa) databases by using the R package clusterProfiler (54). Differentially expressed genes were  
382 visualized by using proteomaps (55). The reference gene list of *Vp* used in proteomaps was  
383 constructed based on the JSON file in the KEGG orthology database by Python (treemap  
384 template ID: *Vibrio parahaemolyticus* RIMD 2210633 V7).

385  
386 **Quantitative real-time PCR (qRT-PCR) validation.** To validate the transcriptomics results,  
387 genes of each *Vp* strain showing the same up- or down-regulation patterns at both 10 and 30 °C  
388 were selected for validation studies. The gene *pvuA* was used as the housekeeping reference gene  
389 as its expression level has shown to be stable through a wide range of temperatures (56). The  
390 expression level of the select gene was normalized to reference gene and calculated by using the  
391  $-\Delta\Delta C_t$  method (57). The list of primers used in this study is provided in supplementary **Table 1**.  
392 qRT-PCR was conducted on the QuanStudio™ Real-Time PCR system (Applied Biosystems,  
393 Foster City, CA). The total volume of each reaction was set to 25  $\mu$ l, consisting of 2  $\mu$ l cDNA  
394 aliquot (concentration 1ul/ml), 1  $\mu$ l forward primer (1  $\mu$ m/ $\mu$ l), 1ul reverse primer (1  $\mu$ m/ $\mu$ l), 12.5

395  $\mu\text{l}$   $2 \times$  SYBR™ Green PCR Master Mix (Life Technologies, Carlsbad, CA, United States), and  
396 8.5  $\mu\text{l}$  nuclease water. Program of thermocycler was set to start with an initial denaturing period  
397 at 95 °C for 10 min and then 40 cycles of 95 °C for 15 s, 52 °C for 20 s and 72 °C for 25 s. The  
398 specificity of the PCR product was checked by analyzing the melt curve.

399

400 **Data availability.** The raw and processed RNA-Seq data can be found in the GEO database  
401 under accession number PRJNA949728 and PRJNA949727.

402

### 403 SUPPLEMENTAL MATERIAL

404 Supplemental material is available online only.

405

### 406 ACKNOWLEDGMENTS

407 This work was supported by funding from USDA HATCH grant S1077.

408 L.W. and C.L. designed the study. C.L. and Z.L. performed the experiments. C.L.  
409 analyzed the *Vp* fitness data. Z.L. analyzed the RNA-Seq data. Z.L. initiated the manuscript draft.  
410 C.L. and L.W. reviewed and revised the manuscript.

411 We declare no competing interests.

412

413

414

415

416

### 417 REFERENCES

- 418 1. Nilsson WB, Paranjpye RN, Hamel OS, Hard C, Strom MS. 2019. *Vibrio*  
419 *parahaemolyticus* risk assessment in the Pacific Northwest: it's not what's in the water.  
420 FEMS microbiology ecology 95:fiz027.
- 421 2. FDA. 2019. NSSP Guide for the Control of Molluscan Shellfish: 2019 Revision

- 422 3. CDC. 2019. Multistate Outbreak of Gastrointestinal Illnesses Linked to Oysters Imported  
423 from Mexico Available at [https://www.cdc.gov/vibrio/investigations/rawoysters-05-](https://www.cdc.gov/vibrio/investigations/rawoysters-05-19/index.html)  
424 [19/index.html](https://www.cdc.gov/vibrio/investigations/rawoysters-05-19/index.html) Accessed on January 9th, 2023.
- 425 4. CDC. 2013. *Vibrio parahaemolyticus* illnesses associated with consumption of shellfish,  
426 United States, 2013 Available at [https://www.cdc.gov/vibrio/investigations/vibriop-09-](https://www.cdc.gov/vibrio/investigations/vibriop-09-13/index.html)  
427 [13/index.html](https://www.cdc.gov/vibrio/investigations/vibriop-09-13/index.html) Accessed on January 9th, 2023
- 428 .
- 429 5. Beecher C. 2021. Available at [https://www.foodsafetynews.com/2021/07/oysters-](https://www.foodsafetynews.com/2021/07/oysters-recalled-amid-washingtons-largest-ever-vibrio-outbreak/)  
430 [recalled-amid-washingtons-largest-ever-vibrio-outbreak/](https://www.foodsafetynews.com/2021/07/oysters-recalled-amid-washingtons-largest-ever-vibrio-outbreak/) Accessed at January 9th, 2023.
- 431 6. Freitag A, Ellett A, Burkart H, Jacobs J. 2022. Estimating the Economic Burden of  
432 *Vibrio parahaemolyticus* in Washington State Oyster Aquaculture: Implications for the  
433 Future. *Journal of Shellfish Research* 40:555-564.
- 434 7. USDA. 2013. Cost of foodborne illness estimates for *Vibrio parahaemolyticus*. Available  
435 at [https://www.usdagov/data-products/cost-estimates-of-foodborne-illnesses/cost-](https://www.usdagov/data-products/cost-estimates-of-foodborne-illnesses/cost-estimates-of-foodborne-illnesses/)  
436 [estimates-of-foodborne-illnesses/](https://www.usdagov/data-products/cost-estimates-of-foodborne-illnesses/cost-estimates-of-foodborne-illnesses/) Accessed on March 4, 2023.
- 437 8. Yoon J-H, Bae Y-M, Lee S-Y. 2017. Effects of varying concentrations of sodium  
438 chloride and acidic conditions on the behavior of *Vibrio parahaemolyticus* and *Vibrio*  
439 *vulnificus* cold-starved in artificial sea water microcosms. *Food Science and*  
440 *Biotechnology* 26:829-839.
- 441 9. Gooch J, DePaola A, Bowers J, Marshall D. 2002. Growth and survival of *Vibrio*  
442 *parahaemolyticus* in postharvest American oysters. *Journal of food protection* 65:970-974.

- 443 10. Hartwick MA, Urquhart EA, Whistler CA, Cooper VS, Naumova EN, Jones SH. 2019.  
444 Forecasting seasonal *Vibrio parahaemolyticus* concentrations in New England shellfish.  
445 International journal of environmental research and public health 16:4341.
- 446 11. Kaneko T, Colwell RR. 1973. Ecology of *Vibrio parahaemolyticus* in Chesapeake bay.  
447 Journal of bacteriology 113:24-32.
- 448 12. Duan J, Su YC. 2005. Occurrence of *Vibrio parahaemolyticus* in two Oregon oyster-  
449 growing bays. Journal of food science 70:M58-M63.
- 450 13. CDC. 2023. National Outbreak Reporting System Available at  
451 <https://www.cdc.gov/nors/index.html> Accessed on March 3, 2023.
- 452 14. Saliba A-E, Santos SC, Vogel J. 2017. New RNA-seq approaches for the study of  
453 bacterial pathogens. Current opinion in microbiology 35:78-87.
- 454 15. Avican K, Aldahdooh J, Togninalli M, Mahmud AF, Tang J, Borgwardt KM, Rhen M,  
455 Fällman M. 2021. RNA atlas of human bacterial pathogens uncovers stress dynamics  
456 linked to infection. Nature Communications 12:3282.
- 457 16. Spaur M, Davis BJ, Kivitz S, DePaola A, Bowers JC, Curriero FC, Nachman KE. 2020.  
458 A systematic review of post-harvest interventions for *Vibrio parahaemolyticus* in raw  
459 oysters. Science of The Total Environment 745:140795.
- 460 17. Xie T, Pang R, Wu Q, Zhang J, Lei T, Li Y, Wang J, Ding Y, Chen M, Bai J. 2019. Cold  
461 tolerance regulated by the pyruvate metabolism in *Vibrio parahaemolyticus*. Frontiers in  
462 Microbiology 10:178.
- 463 18. Yang L, Zhou D, Liu X, Han H, Zhan L, Guo Z, Zhang L, Qin C, Wong H-c, Yang R.  
464 2009. Cold-induced gene expression profiles of *Vibrio parahaemolyticus*: a time-course  
465 analysis. FEMS microbiology letters 291:50-58.

- 466 19. Sun X, Liu T, Peng X, Chen L. 2014. Insights into *Vibrio parahaemolyticus* CHN25  
467 response to artificial gastric fluid stress by transcriptomic analysis. *International journal*  
468 *of molecular sciences* 15:22539-22562.
- 469 20. Ma R, Wang Y, Huang L, Zhao S, Li L, Yin M, Fang W. 2021. Effects of different  
470 salinity on the transcriptome and antibiotic resistance of two *Vibrio parahaemolyticus*  
471 strains isolated from *Penaeus vannamei* cultured in seawater and freshwater ponds.  
472 *Journal of Fish Diseases* 44:2055-2066.
- 473 21. Khouadja S, Lamari F, Bakhrouf A. 2013. Characterization of *Vibrio parahaemolyticus*  
474 isolated from farmed sea bass (*Dicentrarchus labrax*) during disease outbreaks.  
475 *International Aquatic Research* 5:1-11.
- 476 22. Liao C, Zhao Y, Wang L. 2017. Establishment and validation of RNA-based predictive  
477 models for understanding survival of *vibrio parahaemolyticus* in oysters stored at low  
478 temperatures. *Applied and Environmental Microbiology* 83:e02765-16.
- 479 23. Meng L, Alter T, Aho T, Huehn S. 2015. Gene expression profiles of *Vibrio*  
480 *parahaemolyticus* in the early stationary phase. *Letters in Applied Microbiology* 61:231-  
481 237.
- 482 24. Wada A, Mikkola R, Kurland CG, Ishihama A. 2000. Growth phase-coupled changes of  
483 the ribosome profile in natural isolates and laboratory strains of *Escherichia coli*. *Journal*  
484 *of bacteriology* 182:2893-2899.
- 485 25. Wada A. 1998. Growth phase coupled modulation of *Escherichia coli* ribosomes. *Genes*  
486 *to Cells* 3:203-208.

- 487 26. Urmersbach S, Aho T, Alter T, Hassan SS, Autio R, Huehn S. 2015. Changes in global  
488 gene expression of *Vibrio parahaemolyticus* induced by cold-and heat-stress. *BMC*  
489 *microbiology* 15:1-13.
- 490 27. Zhu C, Sun B, Liu T, Zheng H, Gu W, He W, Sun F, Wang Y, Yang M, Bei W. 2017.  
491 Genomic and transcriptomic analyses reveal distinct biological functions for cold shock  
492 proteins (Vpa CspA and Vpa CspD) in *Vibrio parahaemolyticus* CHN25 during low-  
493 temperature survival. *BMC genomics* 18:1-19.
- 494 28. Horn G, Hofweber R, Kremer W, Kalbitzer HR. 2007. Structure and function of bacterial  
495 cold shock proteins. *Cellular and molecular life sciences* 64:1457-1470.
- 496 29. Yoon Y, Lee H, Lee S, Kim S, Choi K-H. 2015. Membrane fluidity-related adaptive  
497 response mechanisms of foodborne bacterial pathogens under environmental stresses.  
498 *Food Research International* 72:25-36.
- 499 30. Lu Y-J, Zhang Y-M, Rock CO. 2004. Product diversity and regulation of type II fatty  
500 acid synthases. *Biochemistry and Cell Biology* 82:145-155.
- 501 31. Tang J, Jia J, Chen Y, Huang X, Zhang X, Zhao L, Hu W, Wang C, Lin C, Wu Z. 2018.  
502 Proteomic analysis of *Vibrio parahaemolyticus* under cold stress. *Current microbiology*  
503 75:20-26.
- 504 32. Reitzer L. 2004. Biosynthesis of glutamate, aspartate, asparagine, L-alanine, and D-  
505 alanine. *EcoSal Plus* 1.
- 506 33. Oikawa T. 2006. Alanine, aspartate, and asparagine metabolism in microorganisms, p  
507 273-288, *Amino Acid Biosynthesis~ Pathways, Regulation and Metabolic Engineering*.  
508 Springer.



- 509 34. Li L, Lu J, Zhan P, Qiu Q, Chen J, Xiong J. 2022. RNA-seq analysis unveils temperature  
510 and nutrient adaptation mechanisms relevant for pathogenicity in *Vibrio*  
511 *parahaemolyticus*. *Aquaculture* 558:738397.
- 512 35. Hui H, Bai Y, Fan T-P, Zheng X, Cai Y. 2020. Biosynthesis of putrescine from L-  
513 arginine using engineered *Escherichia coli* whole cells. *Catalysts* 10:947.
- 514 36. Liu G, Zheng J, Wu X, Xu X, Jia G, Zhao H, Chen X, Wu C, Tian G, Wang J. 2019.  
515 Putrescine enhances intestinal immune function and regulates intestinal bacteria in  
516 weaning piglets. *Food & Function* 10:4134-4142.
- 517 37. Conner RM, Hansen PA. 1967. Effects of valine, leucine, and isoleucine on the growth of  
518 *Bacillus thuringiensis* and related bacteria. *Journal of Invertebrate Pathology* 9:12-18.
- 519 38. Maurelli AT. 1989. Temperature regulation of virulence genes in pathogenic bacteria: a  
520 general strategy for human pathogens? *Microbial pathogenesis* 7:1-10.
- 521 39. Zhang W, Xie R, Zhang XD, Lee LTO, Zhang H, Yang M, Peng B, Zheng J. 2020.  
522 Organism dual RNA-seq reveals the importance of BarA/UvrY in *Vibrio*  
523 *parahaemolyticus* virulence. *The FASEB Journal* 34:7561-7577.
- 524 40. Xie W, Zhou Q-J, Xu Y-X, Zhang M, Zhong S-P, Lu L-L, Qiu H-T. 2022. Transcriptome  
525 analysis reveals potential key immune genes of Hong Kong oyster (*Crassostrea*  
526 *hongkongensis*) against *Vibrio parahaemolyticus* infection. *Fish & Shellfish Immunology*  
527 122:316-324.
- 528 41. Rao R, Bing Zhu Y, Alinejad T, Tiruvayipati S, Lin Thong K, Wang J, Bhassu S. 2015.  
529 RNA-seq analysis of *Macrobrachium rosenbergii* hepatopancreas in response to *Vibrio*  
530 *parahaemolyticus* infection. *Gut Pathogens* 7:1-16.

- 531 42. Han N, Mizan MFR, Jahid IK, Ha S-D. 2016. Biofilm formation by *Vibrio*  
532 *parahaemolyticus* on food and food contact surfaces increases with rise in temperature.  
533 *Food Control* 70:161-166.
- 534 43. Sheng L, Wang L. 2021. The microbial safety of fish and fish products: Recent advances  
535 in understanding its significance, contamination sources, and control strategies.  
536 *Comprehensive Reviews in Food Science and Food Safety* 20:738-786.
- 537 44. Chowdhury R, Sahu GK, Das J. 1996. Stress response in pathogenic bacteria. *Journal of*  
538 *Biosciences* 21:149-160.
- 539 45. Somerville GA, Proctor RA. 2009. At the crossroads of bacterial metabolism and  
540 virulence factor synthesis in *Staphylococci*. *Microbiology and Molecular Biology*  
541 *Reviews* 73:233-248.
- 542 46. Tobe T, Sasakawa C, Okada N, Honma Y, Yoshikawa M. 1992. *vacB*, a novel  
543 chromosomal gene required for expression of virulence genes on the large plasmid of  
544 *Shigella flexneri*. *Journal of bacteriology* 174:6359-6367.
- 545 47. Meng L, Alter T, Aho T, Huehn S. 2015. Gene expression profiles of *Vibrio*  
546 *parahaemolyticus* in viable but non-culturable state. *FEMS Microbiology Ecology* 91.
- 547 48. Baranyi J, Tamplin ML. 2004. ComBase: a common database on microbial responses to  
548 food environments. *Journal of food protection* 67:1967-1971.
- 549 49. Patro R, Duggal G, Love MI, Irizarry RA, Kingsford C. 2017. Salmon provides fast and  
550 bias-aware quantification of transcript expression. *Nature methods* 14:417-419.
- 551 50. Makino K, Oshima K, Kurokawa K, Yokoyama K, Uda T, Tagomori K, Iijima Y, Najima  
552 M, Nakano M, Yamashita A. 2003. Genome sequence of *Vibrio parahaemolyticus*: a  
553 pathogenic mechanism distinct from that of *V cholerae*. *The Lancet* 361:743-749.

- 554 51. Sonesson C, Love MI, Robinson MD. 2015. Differential analyses for RNA-seq: transcript-  
555 level estimates improve gene-level inferences. *F1000Research* 4.
- 556 52. Love MI, Huber W, Anders S. 2014. Moderated estimation of fold change and dispersion  
557 for RNA-seq data with DESeq2. *Genome biology* 15:1-21.
- 558 53. Huerta-Cepas J, Forslund K, Coelho LP, Szklarczyk D, Jensen LJ, Von Mering C, Bork P.  
559 2017. Fast genome-wide functional annotation through orthology assignment by  
560 eggNOG-mapper. *Molecular biology and evolution* 34:2115-2122.
- 561 54. Wu T, Hu E, Xu S, Chen M, Guo P, Dai Z, Feng T, Zhou L, Tang W, Zhan L. 2021.  
562 clusterProfiler 4.0: A universal enrichment tool for interpreting omics data. *The*  
563 *Innovation* 2:100141.
- 564 55. Liebermeister W, Noor E, Flamholz A, Davidi D, Bernhardt J, Milo R. 2014. Visual  
565 account of protein investment in cellular functions. *Proceedings of the National Academy*  
566 *of Sciences* 111:8488-8493.
- 567 56. Ma Y-j, Sun X-h, Xu X-y, Zhao Y, Pan Y-j, Hwang C-A, Wu VC. 2015. Investigation of  
568 reference genes in *Vibrio parahaemolyticus* for gene expression analysis using  
569 quantitative RT-PCR. *PLoS One* 10:e0144362.
- 570 57. Livak KJ, Schmittgen TD. 2001. Analysis of relative gene expression data using real-  
571 time quantitative PCR and the  $2^{-\Delta\Delta CT}$  method. *methods* 25:402-408.
- 572

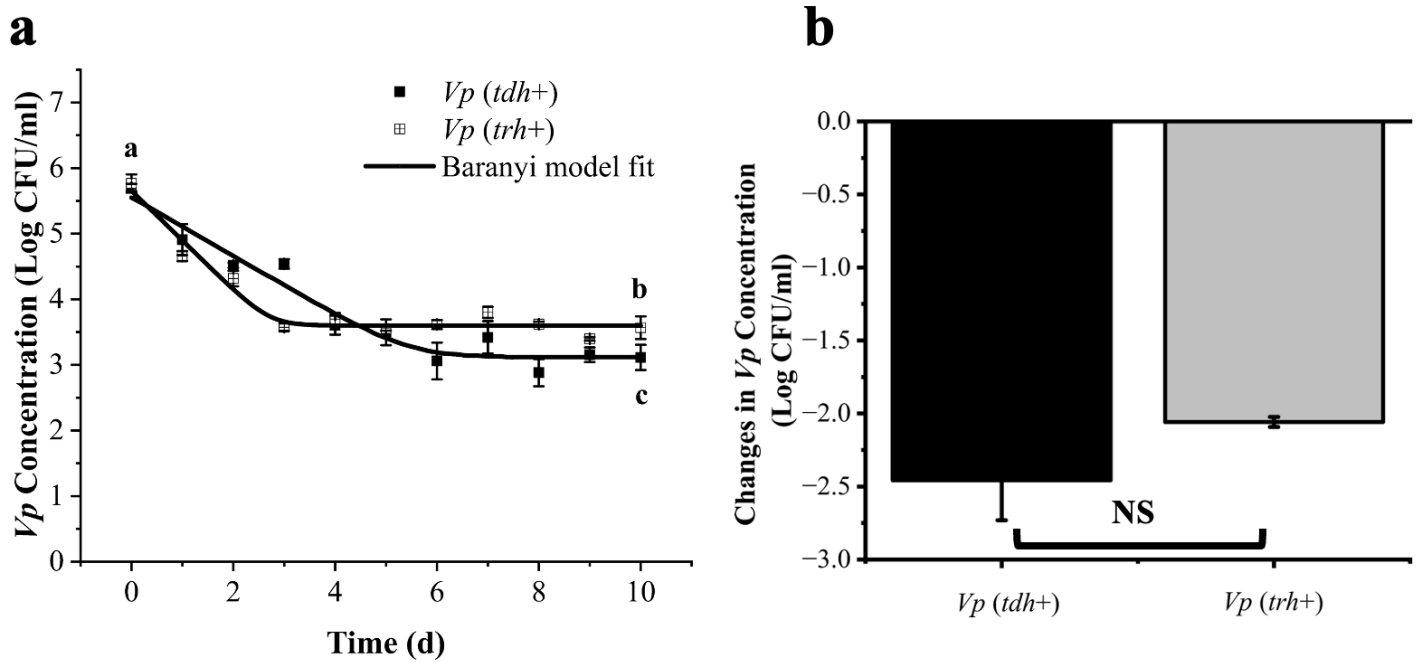

**Figure 1.** Primary predictive models of pathogenic *V. parahaemolyticus* strains (*tdh*+ and *trh*+) incubated in seawater at 10 °C (a); and the comparison of the cell reductions of two strains on Day 10 (b). Different lower-case letters represent significant differences of bacterial counts between the *tdh*+ and the *trh*+ strains at different sampling points. NS represents not significant.

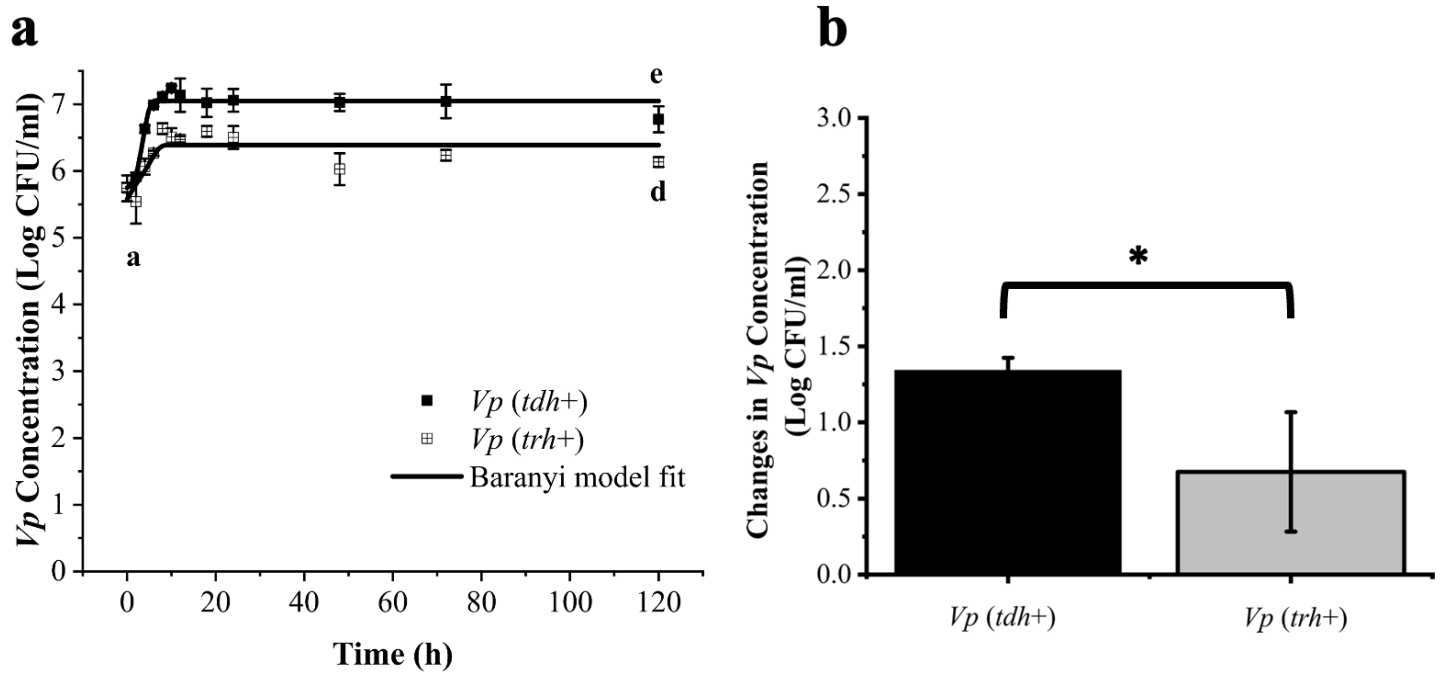

**Figure 2.** Primary predictive models of pathogenic *V. parahaemolyticus* strains (*tdh*+ and *trh*+) incubated in seawater at 30 °C (a); and the comparison of the cell reduction of the two strains on Day 5 (b). Different lower-case letters represent significant differences of bacterial counts between the *tdh*+ and the *trh*+ strains at different sampling points. \* represents a significant difference ( $P < 0.05$ ).

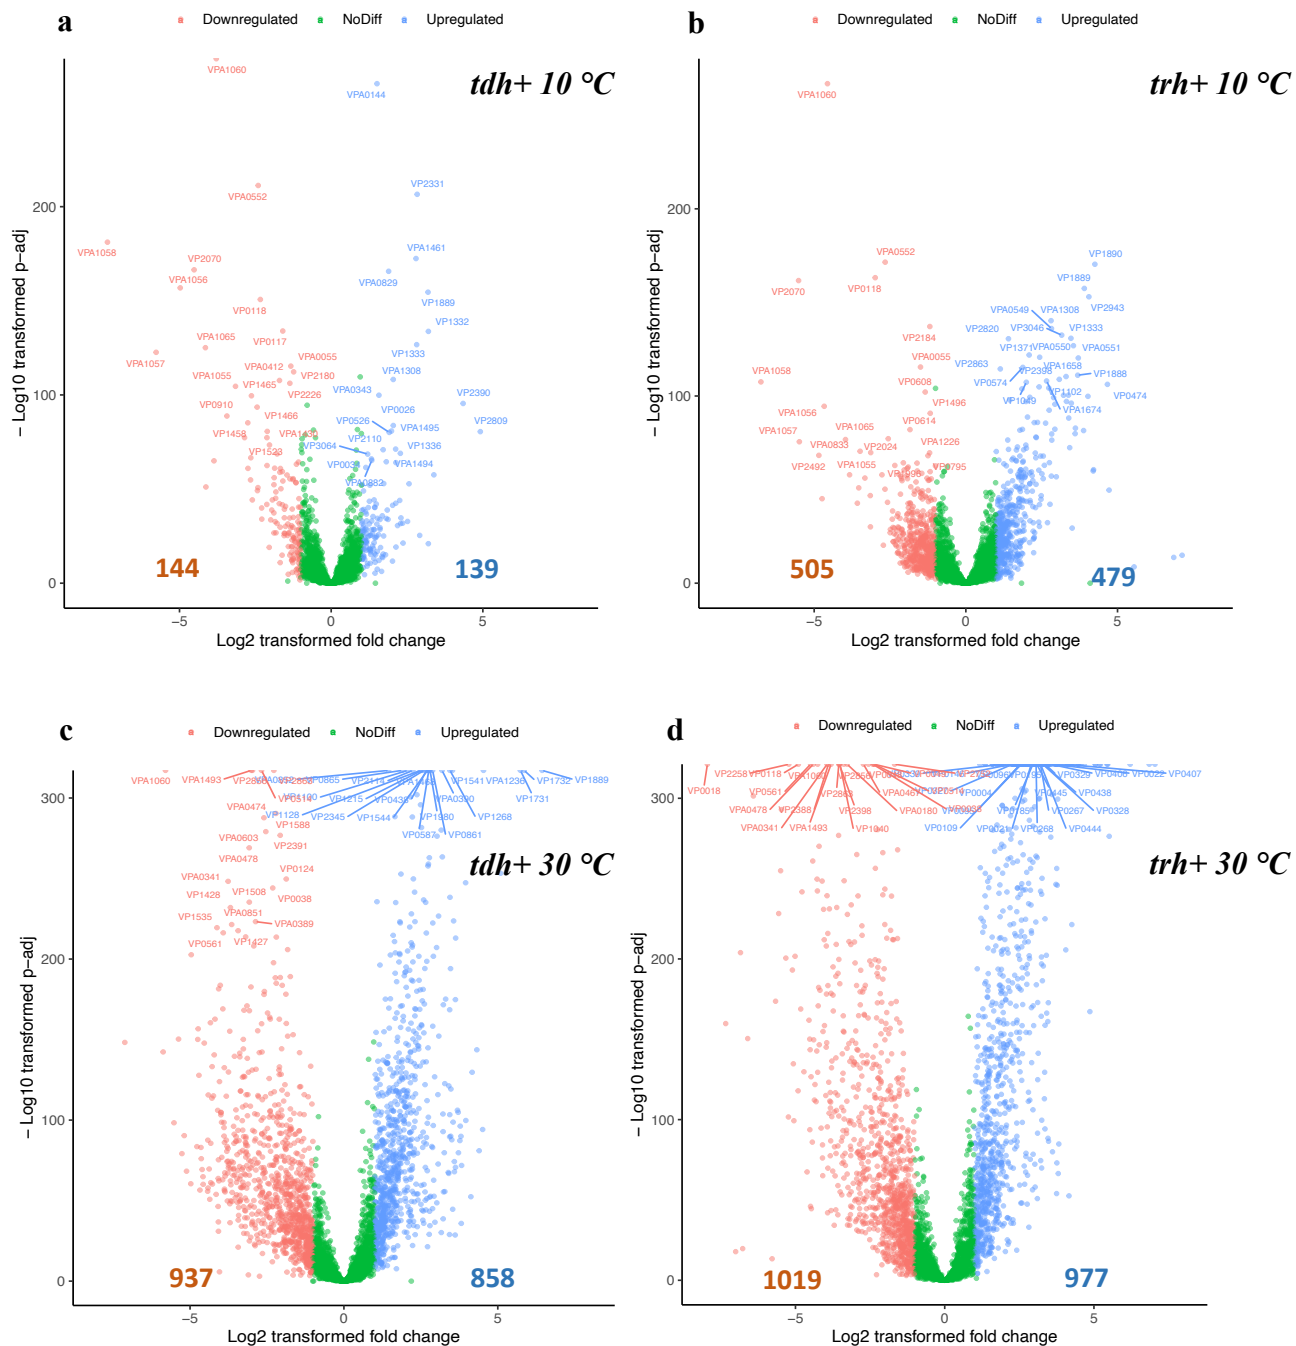

**Figure 3.** Differentially expressed genes of *V. parahaemolyticus* with *tdh+* or *trh+* genes at 10 (a and b) and 30 °C (c and d) for 5 days. The x-axis represents the log<sub>2</sub> of the fold change against the -log<sub>10</sub> of the adjusted p-value. Red dots indicate the differentially expressed genes with at least -1.0 change and statistically different from the control ( $p < 0.05$ ). Blue dots indicate the differentially expressed genes with at least +1.0 change and statistically different from the control ( $p < 0.05$ ).

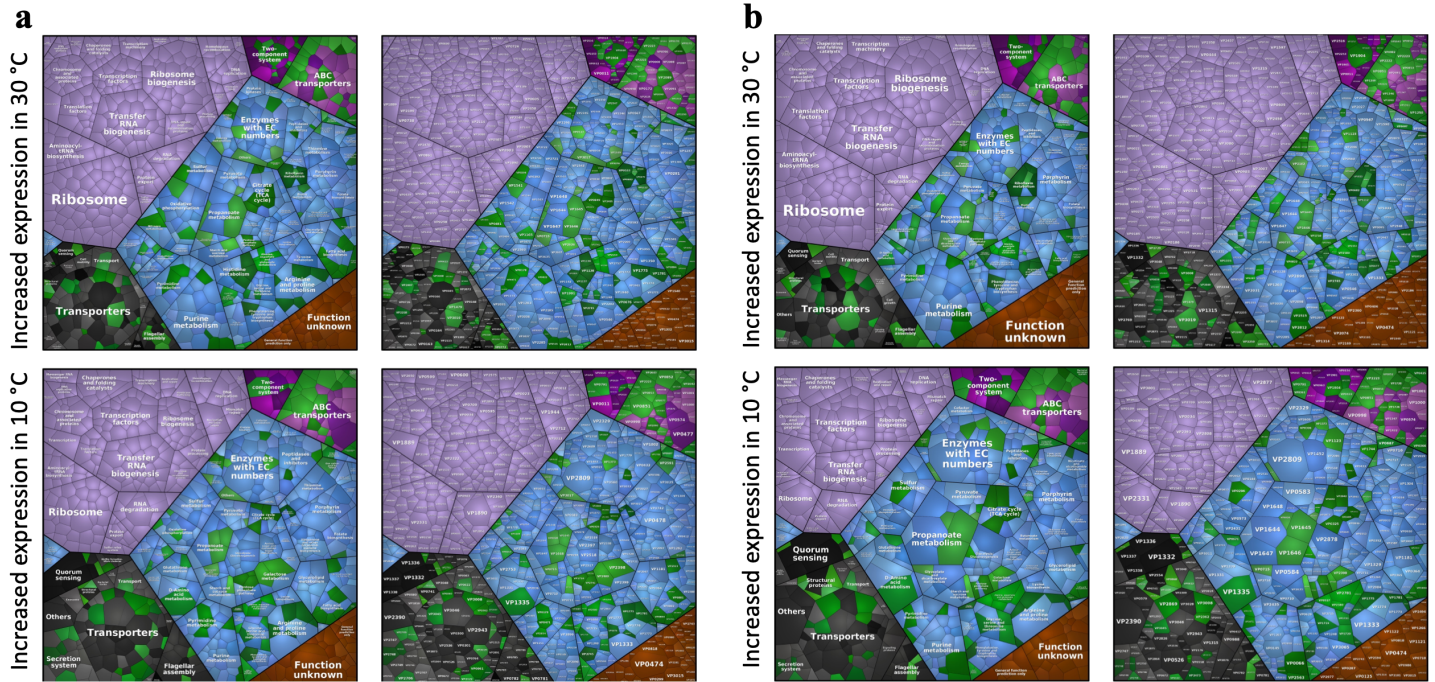

**Figure 4.** Proteomap illustrating differentially expressed genes of *tdh*<sup>+</sup> strain (a) and *trh*<sup>+</sup> strain (b) when stored at 10 or 30 °C for 5 days. Genes are clustered by different functional groups.

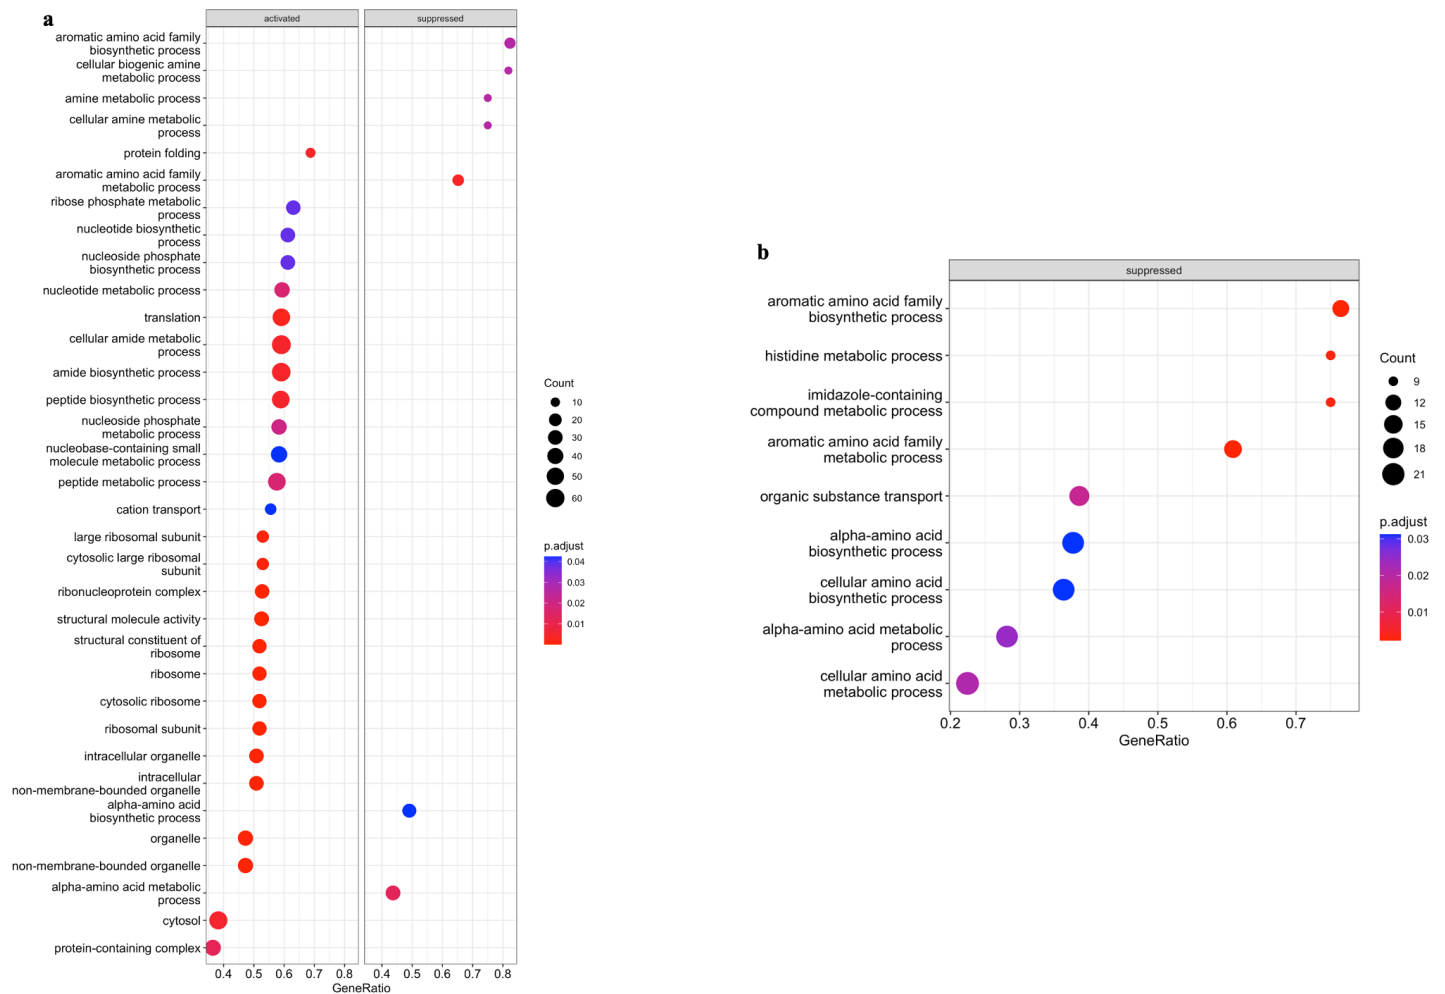



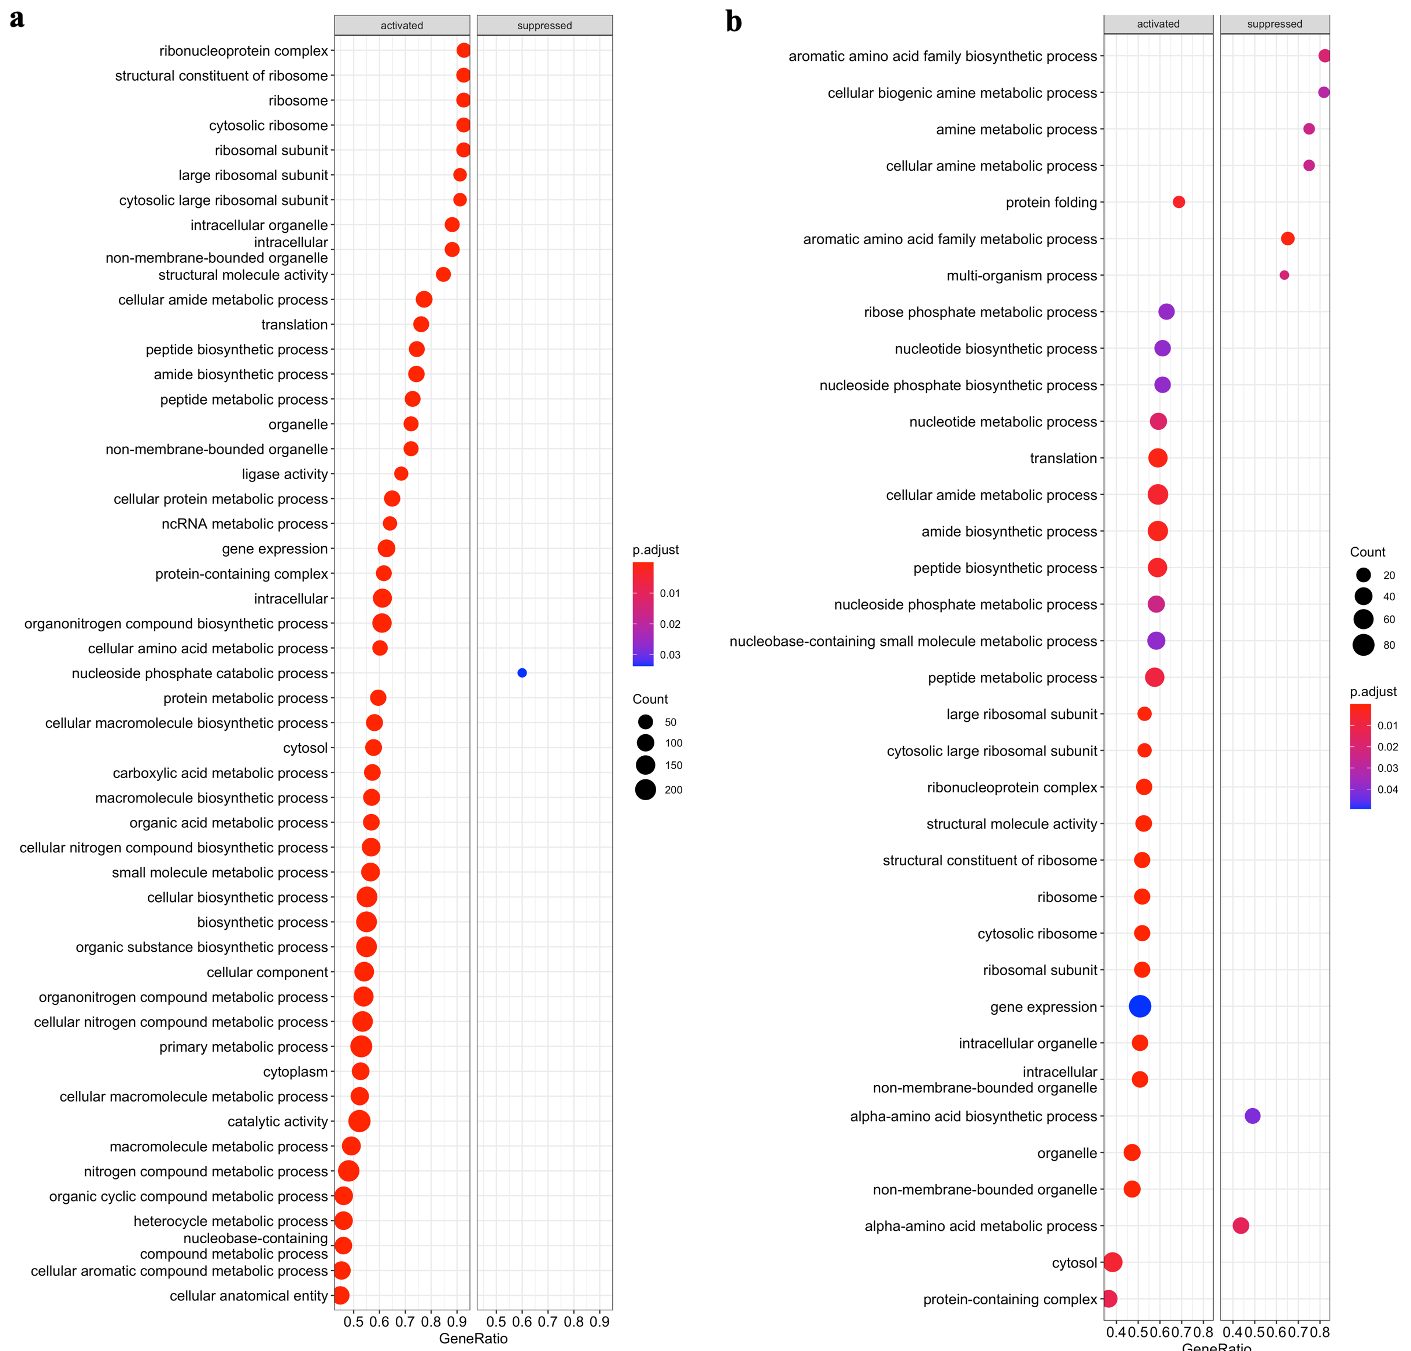

**Figure 6.** Gene set enrichment analysis against Gene Ontology database (GO) of *tdh*<sup>+</sup> (a) and *trh*<sup>+</sup> strains (b) when stored at 30 °C in seawater for 5 days.

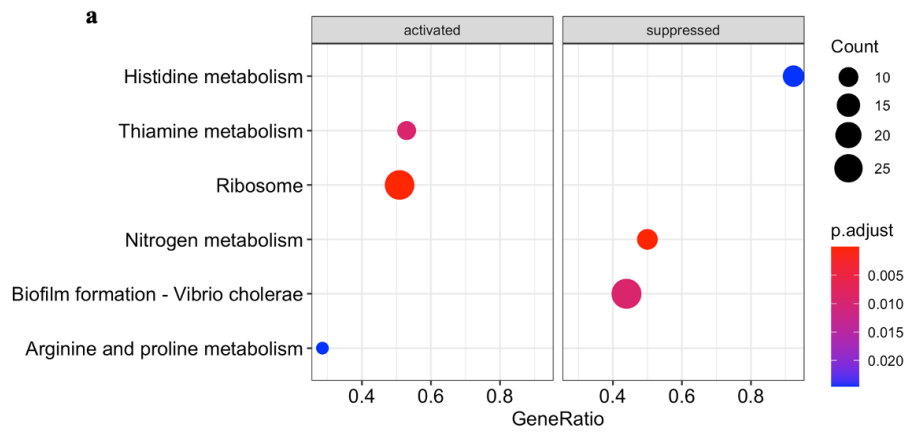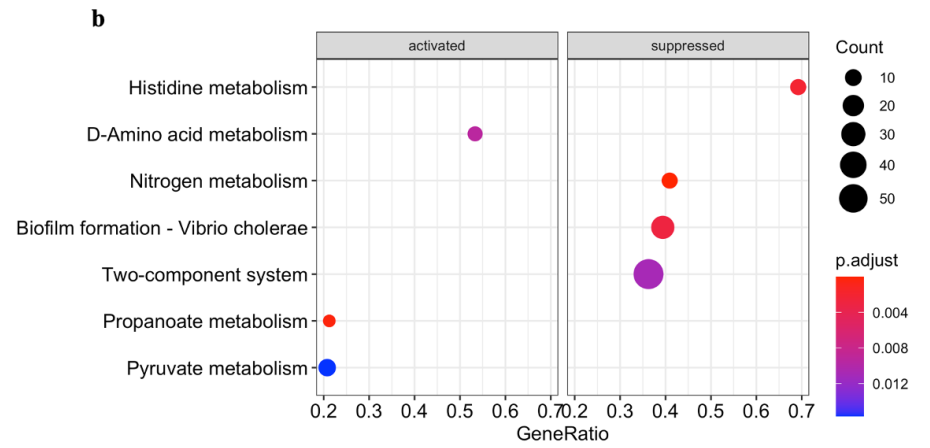

**Figure 7.** Gene set enrichment analysis against Kyoto Encyclopedia of Genes and Genomes database (KEGG) of *tdh*+(a) and *trh*+ strains (b) when stored at 10 °C in seawater for 5 days.

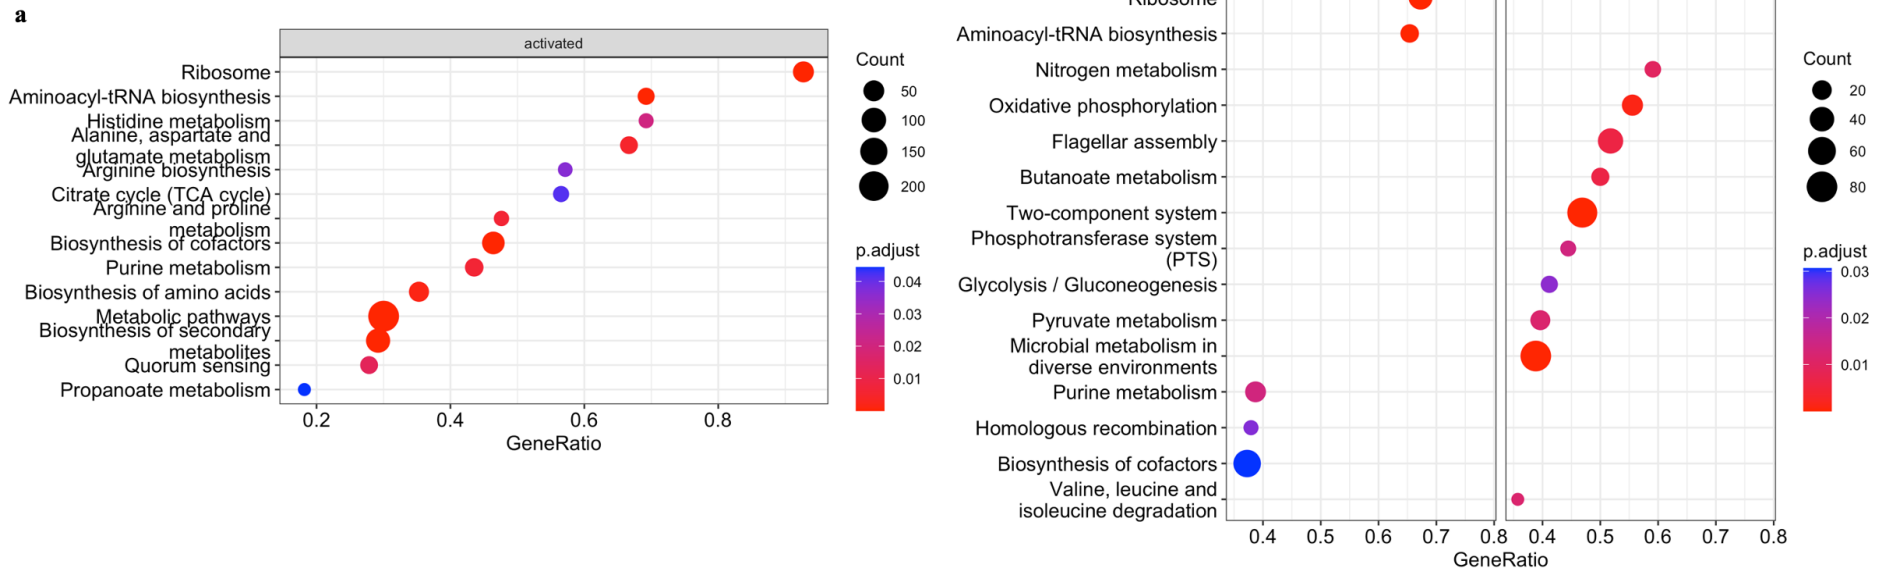

**Figure 8.** Gene set enrichment analysis against Kyoto Encyclopedia of Genes and Genomesdatabase (KEGG) of *tdh*+(a) and *trh*+ strains (b) when stored at 10 °C in seawater for 5 days.

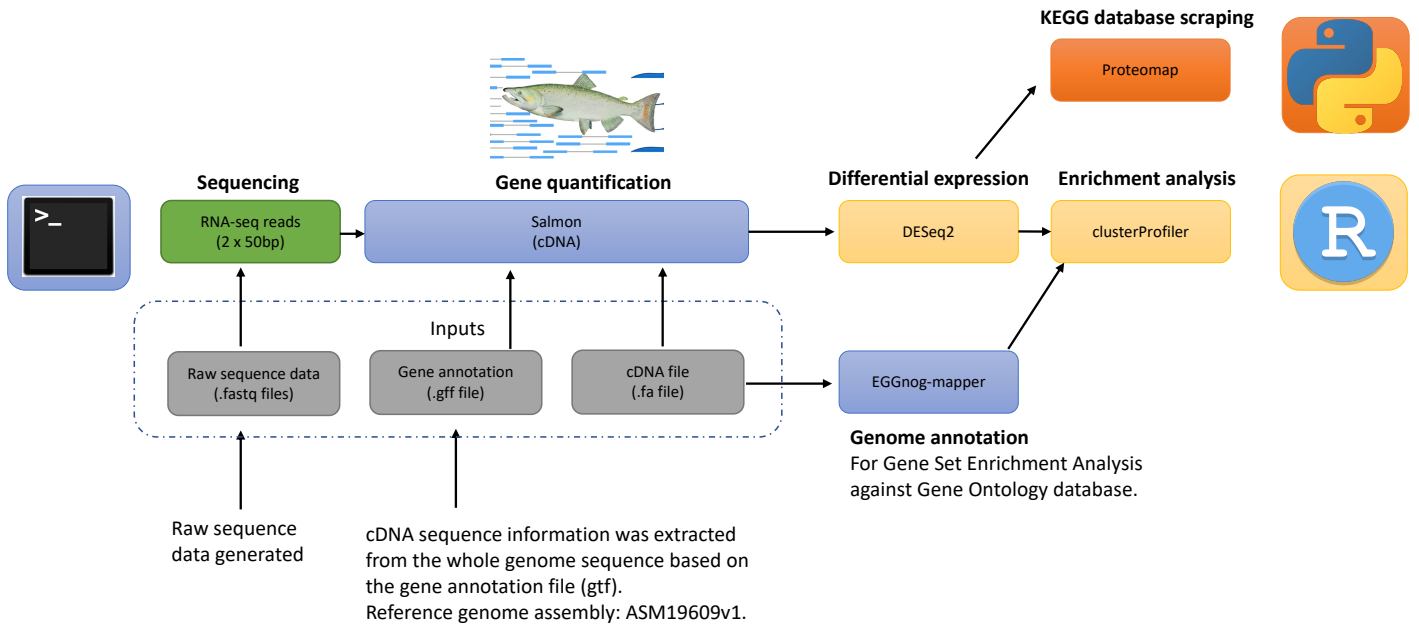

**Figure S1.** A schematic illustration of the analytical pipeline for the transcriptomic data. Blue color indicates steps conducted in linux system. Yellow color indicates steps conducted in R. Orange color indicates steps conducted in Python.

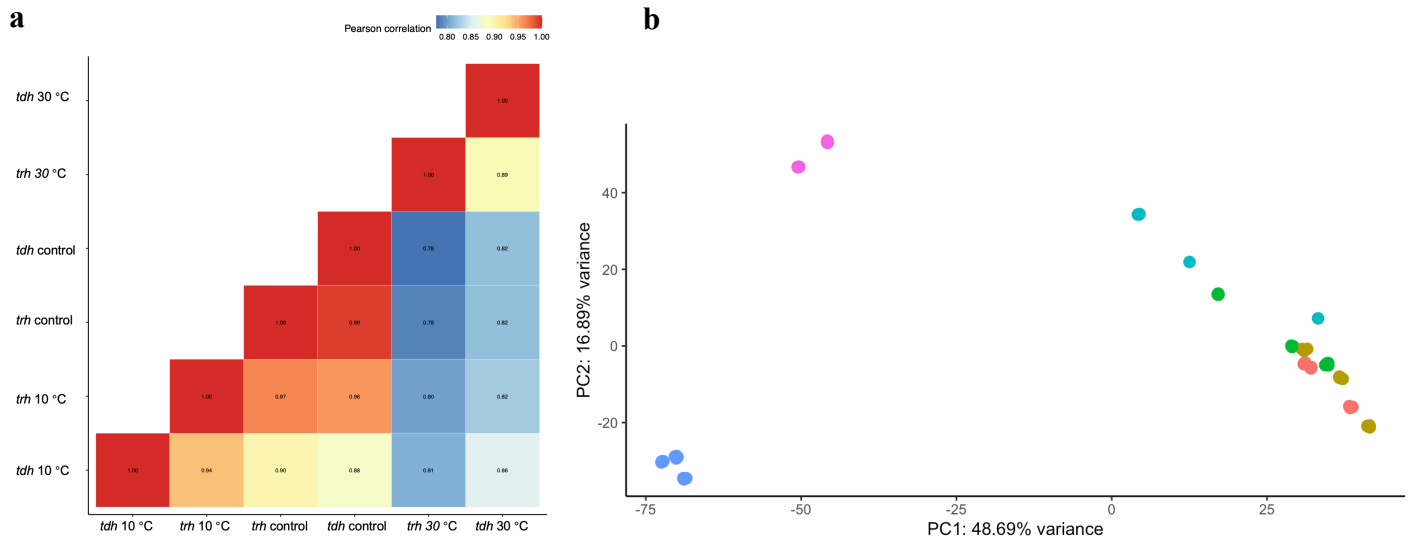

**Figure S2.** Pearson correlation (a) of transcriptomic profiles *V. parahaemolyticus* in the control group (2 hours after inoculation) and tested groups (10 and 30 °C); Principal component analysis (b) of transcriptomic profiles *V. parahaemolyticus* in the control group (2 hours after seawater inoculation) and tested groups (10 and 30 °C). ● *tdh*<sup>+</sup> and ● *trh*<sup>+</sup> in the control group, ● *tdh*<sup>+</sup> and ● *trh*<sup>+</sup> in 10 °C group, and ● *tdh*<sup>+</sup> and ● *trh*<sup>+</sup> in 30 °C group.

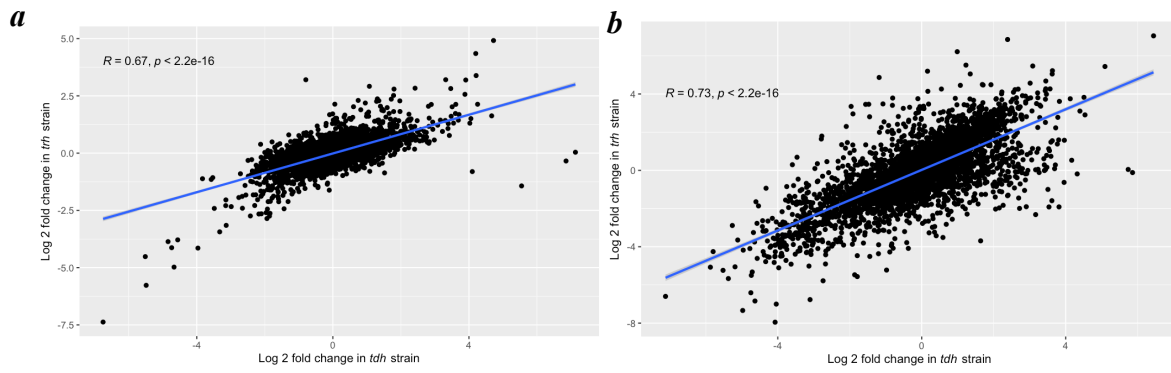

**Figure S3.** Scatter plots of the comparison of gene expression levels between *tdh*<sup>+</sup> and *trh*<sup>+</sup> strains when stored at 10 °C (a) and 30 °C (b) for 5 days.

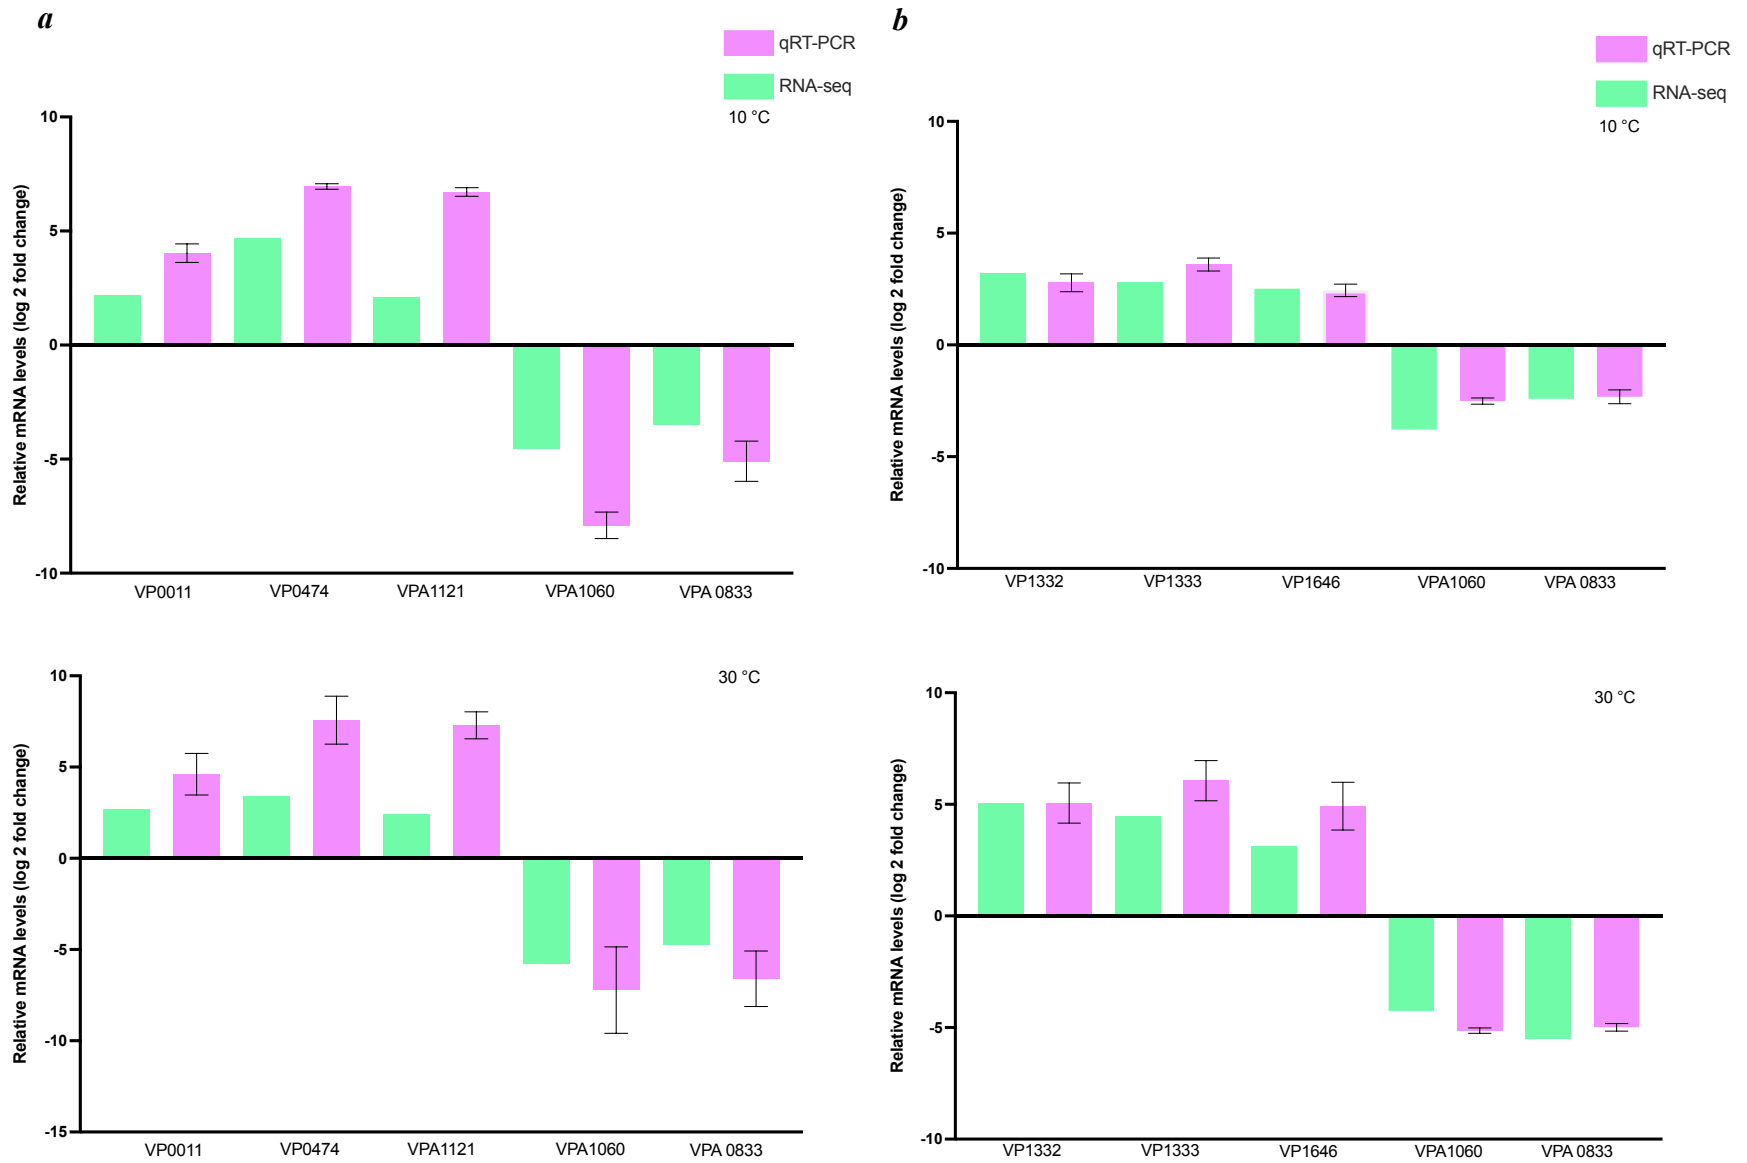

**Figure S4.** Validation of the select differentially expressed genes identified from RNA-seq results by qRT-PCR for *tdh*<sup>+</sup> strain (a) and *trh*<sup>+</sup> strain (b).

**Table 1.** Primary predictive models predicting *Vp* fitness in seawater at 10 and 30 °C.

| Temperature | Parameters      | <i>V. parahaemolyticus</i><br>( <i>tdh</i> +) | <i>V. parahaemolyticus</i><br>( <i>trh</i> +) |
|-------------|-----------------|-----------------------------------------------|-----------------------------------------------|
| 10 °C       | R <sup>2</sup>  | 0.943                                         | 0.95                                          |
|             | IV (Log CFU/ml) | 5.554±0.164 <sup>a*</sup>                     | 5.655 ± 0.143 <sup>a</sup>                    |
|             | FV (Log CFU/ml) | 3.115±0.108 <sup>b</sup>                      | 3.6±0.058 <sup>c</sup>                        |
|             | SIR (Log CFU/d) | -0.447±0.0602                                 | -0.758±0.111                                  |
| 30 °C       | R <sup>2</sup>  | 0.931                                         | 0.674                                         |
|             | IV (Log CFU/ml) | 5.751±0.127 <sup>a</sup>                      | 5.435 ± 0.185 <sup>a</sup>                    |
|             | FV (Log CFU/ml) | 7.047±0.0427 <sup>c</sup>                     | 6.387 ± 0.0768 <sup>d</sup>                   |
|             | SGR (Log CFU/h) | 0.391±0.125                                   | 0.146±0.0575                                  |

IV: Initial value of *Vp* population; FV: Final value; SIR: Specific inactivation rate; SGR: specific growth rate. \*Different lowercase letters represent significant differences ( $p < 0.05$ ).



**Table 2.** Primers used in qRT-PCR analysis for the validation of randomly selected differentially expressed genes identified by RNA-seq.

| Gene        | ID      | Encoding protein                                    | Sequence 5' to 3'                                            | Size (bp) | Reference             | Condition                                |
|-------------|---------|-----------------------------------------------------|--------------------------------------------------------------|-----------|-----------------------|------------------------------------------|
| <i>pvuA</i> | VPA1656 | Ferric vibrioferrin receptor                        | CAAACCTCACTCAGACTCCA<br>CGAACCGATTCAACACG                    | 156       | Coutard et al. (2007) | All                                      |
|             | VP1332  | Binding protein component of ABC transporter        | ATCGTCGTATCGACCGTCTTAG<br>CTAGTAGGCGGTAAACTTCGT<br>CAG       | 193       | This study            | <i>trh+</i> _10&30                       |
| <i>ocd2</i> | VP1333  | Ornithine cyclodeaminase Ocd2                       | GTACTGGCAACTTAGCCCCTTA<br>AGACACAGAGAACTGTCGCTC<br>TTC       | 170       | This study            | <i>trh+</i> _10&30                       |
| <i>acnD</i> | VP1646  | Aconitate hydratase                                 | GTACCGGAAGAGGACTTCAAC<br>TCT<br>CCACATACGTACAACCTGACC<br>TTC | 174       | This study            | <i>trh+</i> _10&30                       |
| <i>dnaA</i> | VP0011  | Chromosomal replication initiator protein           | GCTTCAAGAAGAGCTACCAGC<br>TAC<br>GGCGCGAATAGAGTGAGAGTA<br>T   | 93        | This study            | <i>trh+</i> _10&30                       |
|             | VP0474  | Probable membrane transporter protein               | GGTGGAGTTGGTTTCTACGAT<br>G<br>CCATACAGGTAACCCTGCTAG<br>AAC   | 180       | This study            | <i>tdh+</i> _10&30                       |
|             | VPA1121 | Putative acyl-CoA dehydrogenase                     | GGTGGCTATGGCTACATCAAA<br>G<br>GCTCTACGTCTTCCGTGAGTAA<br>AC   | 136       | This study            | <i>tdh+</i> _10&30                       |
|             | VPA1060 | Putative two-component response regulatory proteins | GCTCTTCAACCTTGGATTGACC<br>TGTACGCGTGTTCCCTCATCTAC            | 166       | This study            | <i>trh+</i> _10&30<br><i>tdh+</i> _10&30 |

---

|             |         |                                            |                                                        |     |            |                                          |
|-------------|---------|--------------------------------------------|--------------------------------------------------------|-----|------------|------------------------------------------|
| <i>glgC</i> | VPA0833 | Glucose-1-phosphate<br>adenylyltransferase | GAAAACCCACCTACTCTTCCA<br>GAC<br>GTCATGGCTAGACGTTTCCAGT | 129 | This study | <i>trh+</i> _10&30<br><i>tdh+</i> _10&30 |
|-------------|---------|--------------------------------------------|--------------------------------------------------------|-----|------------|------------------------------------------|

---
